# Supplementary material for: Performance and mechanisms of Cd( ii ) removal by phosphate-modified natural pyrite
Source: Royal Society of Chemistry journal article supplement (doi:10.1039/d5nj03723a), 2026-01-01
Supplement: d5nj03723a1.pdf [file d5nj03723a1.pdf]

## Supplementary Material

# Performance and Mechanisms of Cd(II) Removal by Phosphate-Modified Natural Pyrite

Lili Lin<sup>c, 1</sup>, Chao Wang<sup>a, 1</sup>, Xiaoshan Luo<sup>c</sup>, Ziwei Tai<sup>a</sup>, Yaxin Qin<sup>a, \*</sup>, Wei Liu<sup>b, \*</sup>

<sup>a</sup>School of Chemistry and Environmental Engineering, Wuhan Institute of Technology, Wuhan 430205, People's Republic of China

<sup>b</sup>State Key Laboratory of Green and Efficient Development of Phosphorus Resources, Hubei Key Laboratory of Novel Reactor and Green Chemical Technology, School of Chemical Engineering and Pharmacy, Wuhan Institute of Technology, Wuhan 430205, People's Republic of China

<sup>c</sup>Central-Southern China Environmental Test and Detection Technology Institute (Wuhan) Co., Ltd.

<sup>1</sup>These authors should be considered co-first authors.

\*To whom correspondence should be addressed. E-mail: [qinyaxin168@163.com](mailto:qinyaxin168@163.com) (Y. Qin); [liu\\_wei@wit.edu.cn](mailto:liu_wei@wit.edu.cn) (W. Liu).

## Text S1. Chemicals

The natural pyrite ( $\text{FeS}_2$ ) was sourced from Wuhan Wanquan Mining Co., Ltd. Hydrochloric acid (HCl), nitric acid ( $\text{HNO}_3$ ), potassium dihydrogen phosphate ( $\text{KH}_2\text{PO}_4$ ), cadmium nitrate ( $\text{Cd}(\text{NO}_3)_2 \cdot 4\text{H}_2\text{O}$ ), ascorbic acid ( $\text{C}_6\text{H}_8\text{O}_6$ ), ammonium molybdate tetrahydrate ( $\text{H}_{32}\text{Mo}_7\text{N}_6\text{O}_{28}$ ), potassium antimony tartrate ( $\text{C}_8\text{H}_8\text{KO}_{12}\text{Sb}$ ), and anhydrous ethanol ( $\text{CH}_3\text{CH}_2\text{OH}$ ) were purchased from Shanghai Sinopharm Chemical Reagent Co., Ltd. Humic acid (HA) and fulvic acid (FA) were obtained from Shanghai Yuanye Biotechnology Co., Ltd. All chemical reagents were analytical pure and used without further purification. Ultrapure water ( $> 18 \text{ M}\Omega \cdot \text{cm}$ , PGDZ-10-XH, Pinguan, China) was utilized in all experiments.

## Text S2. Characterizations

Powder X-ray diffraction patterns (XRD) of  $\text{FeS}_2^{\text{bm}}$  and  $\text{FeS}_2@\text{P}^{\text{bm}}$  were characterized using a Bruker D8 Advance X-ray diffractometer with Cu  $\text{K}\alpha$  radiation ( $\lambda = 0.15418 \text{ nm}$ ). Scanning electron microscope with energy dispersive X-ray (SEM-EDX, Regulus8100, Hitachi, Japan) was utilized to determine the surface feature and element contents of  $\text{FeS}_2^{\text{bm}}$  and  $\text{FeS}_2@\text{P}^{\text{bm}}$ . The content of phosphorus modified on  $\text{FeS}_2@\text{P}^{\text{bm}}$  was determined by inductively coupled plasma-atomic emission spectroscopy (ICP-AES). The Zeta potential of  $\text{FeS}_2^{\text{bm}}$  and  $\text{FeS}_2@\text{P}^{\text{bm}}$  were determined using a Zeta potential analyzer (Malvern Zen3600, UK). Chemical states of surface constituents were recorded by Fourier Transform Infrared Spectroscopy (FT-IR, Nicolet iS50, USA), Raman spectrometer (Raman, Thermo DXR Microscope, USA), and XPS (Thermo Scientific K-Alpha, US).

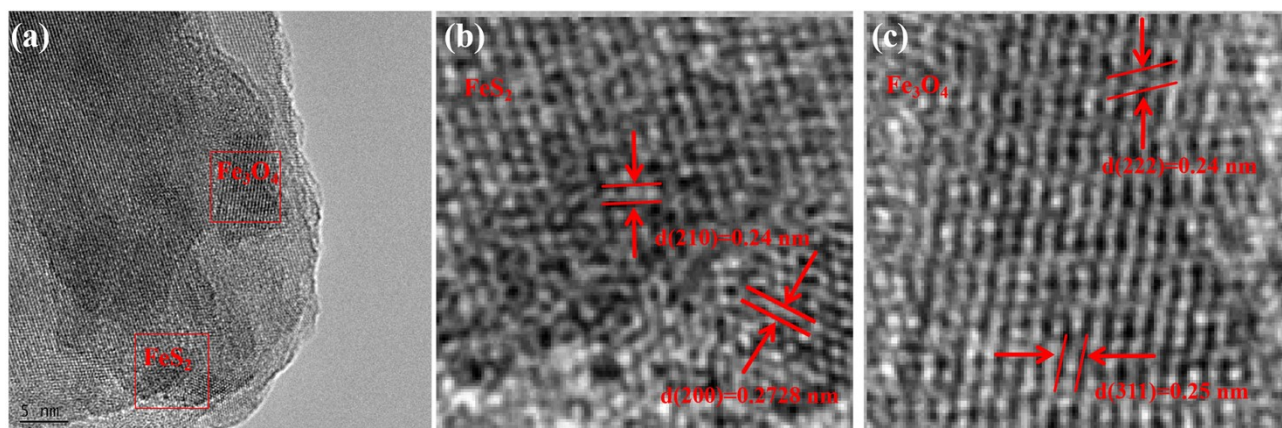

**Fig. S1.** TEM images of  $\text{FeS}_2@\text{P}^{\text{bm}}$ .

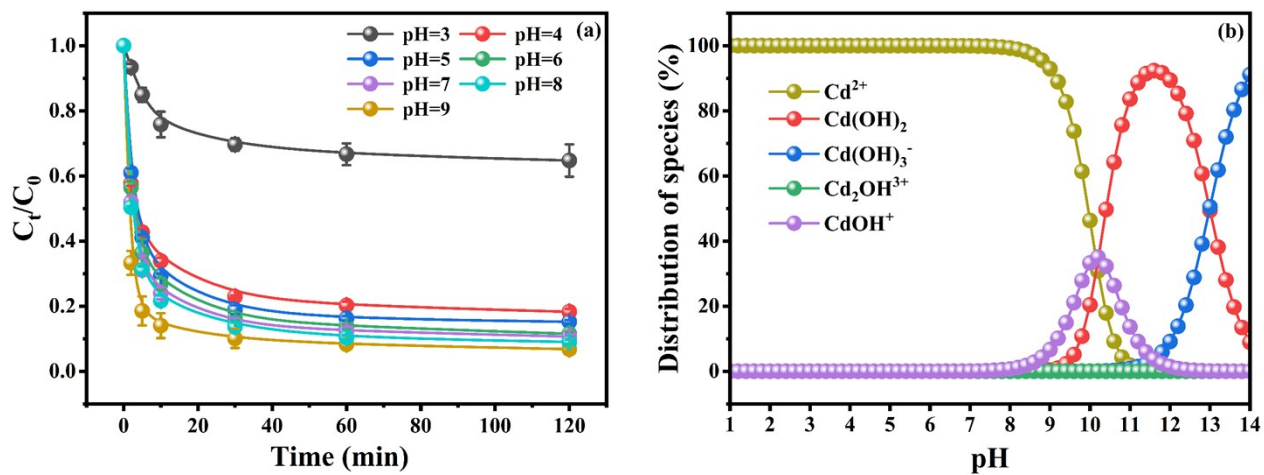

**Fig. S2.** (a) Effects of pH on Cd(II) removal efficiency by FeS<sub>2</sub>@Pbm; (b) theoretical calculation of Cd(II) species distribution at different pH values. [Cd(II)]<sub>0</sub> = 30 mg/L and [FeS<sub>2</sub>@Pbm]<sub>0</sub> = 0.6 g/L.

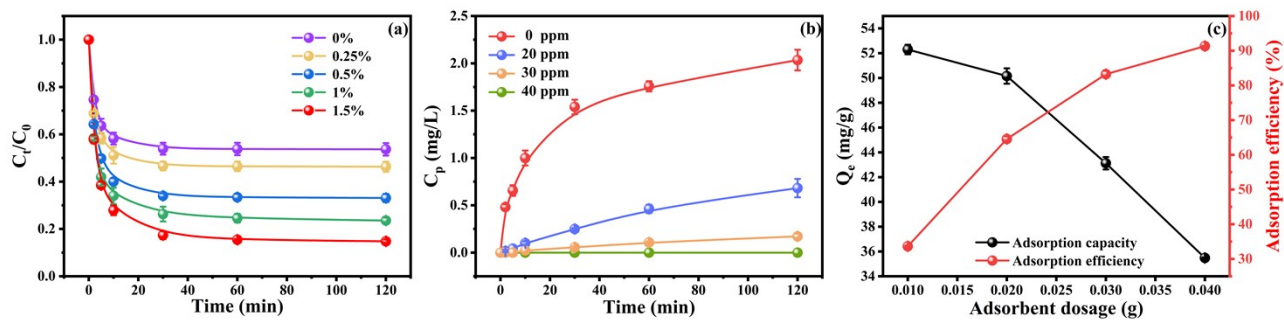

**Fig. S3.** Effects of phosphorus modification ratios on the removal of Cd(II); (b) the released concentration of phosphorus from FeS<sub>2</sub>@P<sup>bm</sup> with different Cd(II) concentrations. (c) effects of adsorbent dosages on the adsorption efficiency of Cd(II) by FeS<sub>2</sub>@P<sup>bm</sup>. [Cd(II)]<sub>0</sub> = 30 mg/L, [FeS<sub>2</sub>@P<sup>bm</sup>]<sub>0</sub> = 0.6 g/L, and pH<sub>initial</sub> = 5.8.

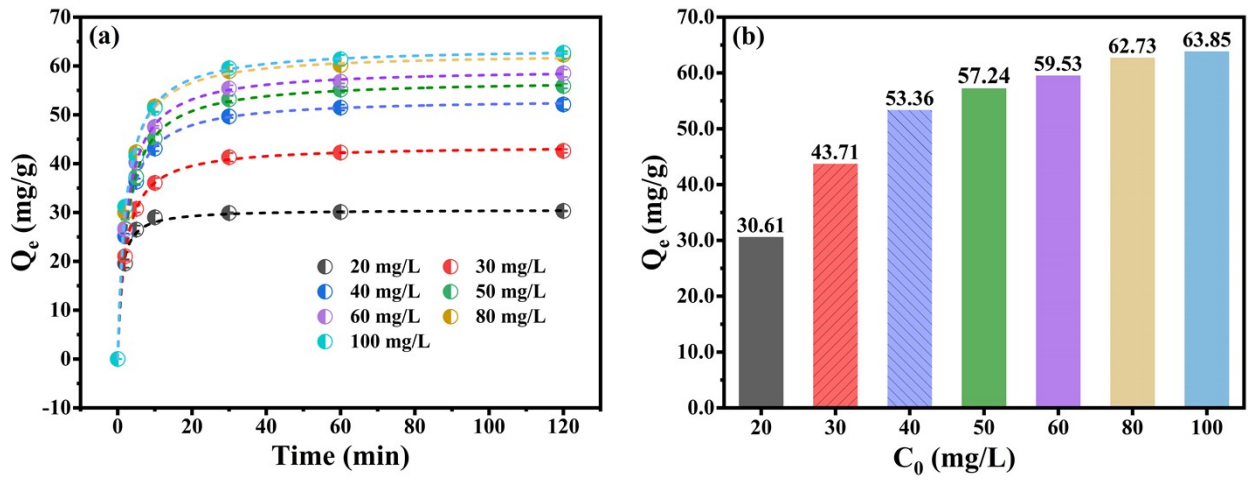

**Fig. S4.** (a) Pseudo-second-order kinetic plots, and pseudo-second-order kinetic rate constants ( $k$ ) of Cd(II) on FeS<sub>2</sub>@P<sup>bm</sup> at different initial Cd(II) concentrations. [FeS<sub>2</sub>@P<sup>bm</sup>]<sub>0</sub> = 0.6 g/L and pH<sub>initial</sub> = 5.8.

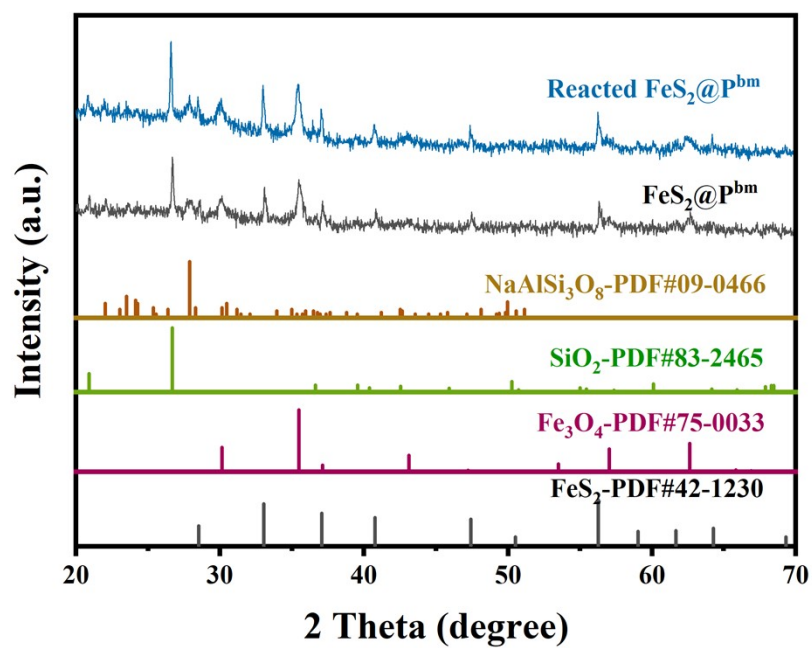

**Fig. S5.** XRD patterns of pristine and reacted FeS<sub>2</sub>@P<sup>bm</sup>.

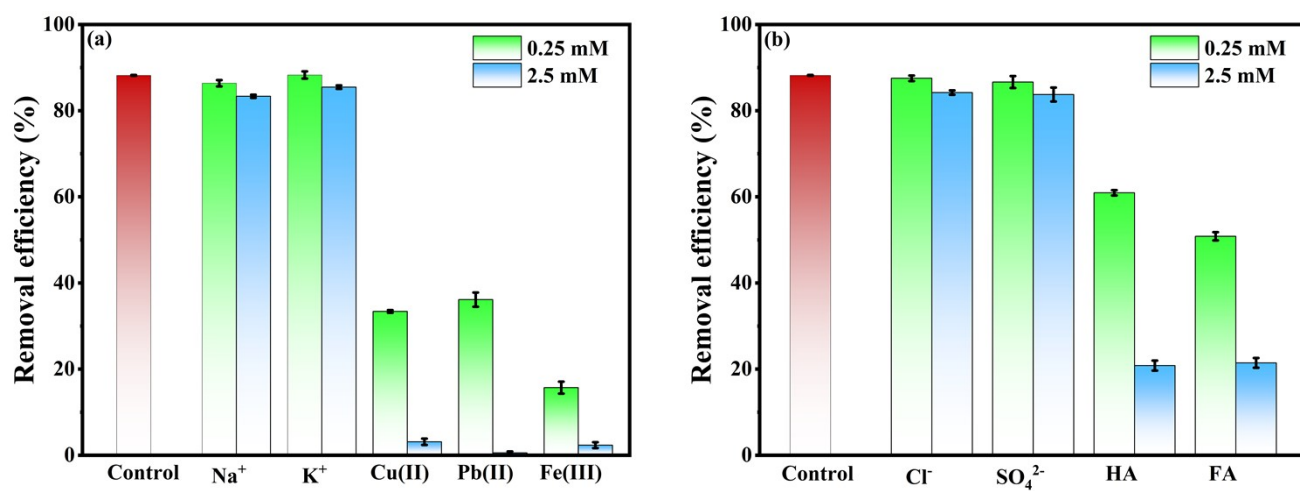

**Fig. S6.** Effects of coexisting ions and natural organic matter on the adsorption efficiency of Cd(II) by

FeS<sub>2</sub>@P<sup>bm</sup>. [Cd(II)]<sub>0</sub> = 30 mg/L, [FeS<sub>2</sub>@P<sup>bm</sup>]<sub>0</sub> = 0.6 g/L, and pH<sub>initial</sub> = 5.8.



**Table S1.** BET surface area, total pore volume, and average pore diameter of FeS<sub>2</sub><sup>bm</sup> and FeS<sub>2</sub>@P<sup>bm</sup>.

| Samples                           | Surface area/(m <sup>2</sup> •g <sup>-1</sup> ) | Total pore volume/(cm <sup>3</sup> •g <sup>-1</sup> ) | Average pore diameter/(nm) |
|-----------------------------------|-------------------------------------------------|-------------------------------------------------------|----------------------------|
| FeS <sub>2</sub> <sup>bm</sup>    | 35.61                                           | 0.057                                                 | 6.89                       |
| FeS <sub>2</sub> @P <sup>bm</sup> | 12.32                                           | 0.052                                                 | 16.63                      |

**Table S2.** Fitting parameters for pseudo-first-order and pseudo-second-order models that describe Cd(II) adsorption on FeS<sub>2</sub><sup>bm</sup> and FeS<sub>2</sub>@P<sup>bm</sup>.

| Model               | Parameter                                         | Material                            |                                          |
|---------------------|---------------------------------------------------|-------------------------------------|------------------------------------------|
|                     |                                                   | FeS <sub>2</sub> <sup>bm</sup> (0%) | FeS <sub>2</sub> @P <sup>bm</sup> (1.5%) |
| Pseudo-first-order  | Q <sub>e</sub> <sup>a</sup> (mg•g <sup>-1</sup> ) | 23.16                               | 42.60                                    |
|                     | Q <sub>e</sub> <sup>b</sup> (mg•g <sup>-1</sup> ) | 22.67                               | 41.19                                    |
|                     | k <sub>1</sub> (min <sup>-1</sup> )               | 0.36                                | 0.30                                     |
|                     | R <sup>2</sup>                                    | 0.9903                              | 0.9833                                   |
| Pseudo-second-order | Q <sub>e</sub> <sup>b</sup> (mg•g <sup>-1</sup> ) | 23.93                               | 43.77                                    |
|                     | K <sub>2</sub> (min <sup>-1</sup> )               | 0.03                                | 0.01                                     |
|                     | R <sup>2</sup>                                    | 0.9981                              | 0.9997                                   |

**Table S3.** Fitting parameters for the pseudo-second-order model that describe different initial concentrations Cd(II) adsorption on FeS<sub>2</sub>@P<sup>bm</sup>.

[illegible]

**Table S4.** Fitting parameters for the pseudo-first-order and pseudo-second-order models that describe Cd(II) adsorption on FeS<sub>2</sub>@P<sup>bm</sup> under different temperatures.

| Model               | Parameter                                         | Temperature/K |        |        |
|---------------------|---------------------------------------------------|---------------|--------|--------|
|                     |                                                   | 298           | 308    | 318    |
| Pseudo-first-order  | Q <sub>e</sub> <sup>a</sup> (mg•g <sup>-1</sup> ) | 44.67         | 46.68  | 47.24  |
|                     | Q <sub>e</sub> <sup>b</sup> (mg•g <sup>-1</sup> ) | 42.68         | 44.62  | 45.29  |
|                     | k <sub>1</sub> (min <sup>-1</sup> )               | 0.27          | 0.39   | 0.44   |
|                     | R <sup>2</sup>                                    | 0.9802        | 0.9772 | 0.9807 |
| Pseudo-second-order | Q <sub>e</sub> <sup>b</sup> (mg•g <sup>-1</sup> ) | 45.48         | 47.16  | 47.73  |
|                     | K <sub>2</sub> (min <sup>-1</sup> )               | 0.0093        | 0.014  | 0.016  |
|                     | R <sup>2</sup>                                    | 0.9996        | 0.9996 | 0.9998 |

**Table S5.** Fitting parameters for the Langmuir and Freundlich model that describe Cd(II) adsorption on FeS<sub>2</sub>@P<sup>bm</sup> at 298 K.

| Model      | Parameter                                                         | Temperature (298 K) |
|------------|-------------------------------------------------------------------|---------------------|
| Langmuir   | $Q_m$ (g•g <sup>-1</sup> )                                        | 54.83               |
|            | $k_L$ (L•g <sup>-1</sup> )                                        | 0.60                |
|            | $R^2$                                                             | 0.9936              |
|            | 1/n                                                               | 0.13                |
| Freundlich | $K_F$ (mg•g <sup>-1</sup> (L•min <sup>-1</sup> ) <sup>1/n</sup> ) | 32.75               |
|            | $R^2$                                                             | 0.9759              |

**Table S6.** Comparison of the maximum adsorption capacity for Cd(II) by various adsorbents as reported in literature.

| Adsorbent                           | Isotherm model | Solution pH | Adsorbent dosage<br>(g•L <sup>-1</sup> ) | Adsorption capacity<br>(mg•g <sup>-1</sup> ) | Reference |
|-------------------------------------|----------------|-------------|------------------------------------------|----------------------------------------------|-----------|
| MBC (MgCl <sub>2</sub> modified BC) | Langmuir       | 5           | 1                                        | 763.12                                       | [1]       |
| pine bark                           | Freundlich     | 5           | 9.2                                      | 7.5                                          | [2]       |
| STB (sludge-tire composite biochar) | Langumuir      | 7           | 5                                        | 50.25                                        | [3]       |
| Aqueous solution by phosphogypsum   | Freundlich     | 9-11        | 10                                       | 131.58                                       | [4]       |
| Jordanian natural zeolite           | Freundlich     | 6           | 5                                        | 25.9                                         | [5]       |
| Natural limestone                   | Freundlich     | 5           | 25                                       | 8.87                                         | [6]       |
| CM400 (earthworm manure)            | langumuir      | 5.5         | 2                                        | 24                                           | [7]       |
| FeS <sub>2</sub> @P <sup>bm</sup>   | Freundlich     | 5.8         | 0.4                                      | 54.83                                        | This work |

## Reference

- [1] G. Yin, L. Tao, X. Chen, N. S. Bolan, B. Sarkar, Q. Lin, H. Wang, *J. Hazard. Mater.* 2021, **420**, 126487. <https://doi.org/10.1016/j.jhazmat.2021.126487>
- [2] S. Al-Asheh, Z. Duvnjak, *J. Hazard. Mater.* 1997, **56**, 35-51. [https://doi.org/10.1016/s0304-3894\(97\)00040-x](https://doi.org/10.1016/s0304-3894(97)00040-x)
- [3] X. Fan, J. Zhang, Y. Xie, D. Xu, Y. Liu, J. Liu, J. Hou, *J. Water. Sci. Technol.* 2021, **83**, 1429-1445. <https://doi.org/10.2166/wst.2021.058>
- [4] B. Nilgün, C. Hasan, *Chem. Eng. J.* 2008, **140**, 247-254. <https://doi.org/10.1016/j.cej.2007.10.002>
- [5] M. Allawzi, S. Al-Asheh. *Desalin. Water. Treat.* 2010, **22**, 349-354. <https://doi.org/10.5004/dwt.2010.1200>
- [6] B. Knežević, V. Kastratović, *Ecol. Chem. Eng. S.* 2025, **32**, 367-386. <https://doi.org/10.2478/eces-2025-0018>
- [7] Z. Wang, D. Shen, F. Shen, C. Wu, S. Gu, *J. Mol. Liq.* 2017, **241**, 612-621. <https://doi.org/10.1016/j.molliq.2017.05.097>
